# Supplementary material
Source: publisher figshare collection journal article supplement (https://sage.figshare.com/ndownloader/files/34787376)
Supplement: Supplementary file 1 [file 34787376]

**References for Included Studies**

*Antshel, K. M., Biederman, J., Spencer, T. J., & Faraone, S. V. (2016). The neuropsychological profile of comorbid post-traumatic stress disorder in adult ADHD. *Journal of Attention Disorders*, *20*(12), 1047-1055.

*Castel, A. D., Lee, S. S., Humphreys, K. L., & Moore, A. N. (2011). Memory capacity, selective control, and value-directed remembering in children with and without attention-deficit/hyperactivity disorder (ADHD). *Neuropsychology*, *25*(1), 15.

*Cutting, L. E., Koth, C. W., Mahone, E. M., & Denckla, M. B. (2003). Evidence for unexpected weaknesses in learning in children with attention-deficit/hyperactivity disorder without reading disabilities. *Journal of Learning Disabilities*, *36*(3), 259-269.

*Egeland, J., Nordby Johansen, S., & Ueland, T. (2010). Do low-effort learning strategies mediate impaired memory in ADHD? *Journal of Learning Disabilities*, *43*(5), 430-440.

*Felton, R. H., Wood, F. B., Brown, I. S., Campbell, S. K., & Harter, M. R. (1987). Separate verbal memory and naming deficits in attention deficit disorder and reading disability. *Brain and Language*, *31*(1), 171-184.

*Gaultney, J. F., Kipp, K., Weinstein, J., & McNeill, J. (1999). Inhibition and mental effort in attention deficit hyperactivity disorder. *Journal of Developmental and Physical Disabilities*, *11*(2), 105-114.

*Garaas, J. M. (2007). *The effects of time of day on executive function and memory in children with attention-deficit/hyperactivity disorder*. (Doctoral dissertation, University of North Dakota).

*Goldman, M. M. (2005). *Cognitive inhibition in children with attention-deficit/hyperactivity disorder* (Doctoral dissertation, University of Georgia).

*Holdnack, J. A., Moberg, P. J., Arnold, S. E., & Gur, R. C. (1995). Speed of processing and verbal learning deficits in adults diagnosed with attention deficit disorder. *Neuropsychiatry, Neuropsychology, & Behavioral Neurology*.

*Larson, S. W. (2013). *An examination of proactive and retroactive interference in children with attention-deficit/hyperactivity disorder*. (Doctoral Dissertation, Southern Illinois University at Carbondale).

*Loge, D. V., Staton, R. D., & Beatty, W. W. (1990). Performance of children with ADHD on tests sensitive to frontal lobe dysfunction. *Journal of the American Academy of Child & Adolescent Psychiatry*, *29*(4), 540-545.

*Lundervold, A. J., Halleland, H. B., Brevik, E. J., Haavik, J., & Sørensen, L. (2019). Verbal memory function in intellectually well-functioning adults with ADHD: relations to working memory and response inhibition. *Journal of Attention Disorders*, *23*(10), 1188-1198.

*Mackin, R. S. (2001). *Investigating neuropsychological correlates of adult attention deficit disorder (ADHD)*. (Doctoral Dissertation, The Pennsylvania State University).

*Mann, M. J. (2000). *A neuropsychological investigation of dopamine receptor 4 differences among attention deficit hyperactivity disorder-combined type and control children*. (Doctoral Dissertation, The University of Texas at Austin).

*Silverman, A.F. (2001). *Disinhibition, memory, and attention deficit hyperactivity disorder.* (Doctoral Dissertation, The University of Texas at Austin).

*Storm, B. C., & White, H. A. (2010). ADHD and retrieval-induced forgetting: Evidence for a deficit in the inhibitory control of memory. *Memory*, *18*(3), 265-271.

*Stroux, D., Shushakova, A., Geburek-Höfer, A. J., Ohrmann, P., Rist, F., & Pedersen, A. (2016). Deficient interference control during working memory updating in adults with ADHD: An event-related potential study. *Clinical Neurophysiology*, *127*(1), 452-463.

*Studerus, E., Corbisiero, S., Mazzariello, N., Ittig, S., Leanza, L., Egloff, L., ... & Riecher-Rössler, A. (2018). Can neuropsychological testing facilitate differential diagnosis between at-risk mental state (ARMS) for psychosis and adult attention-deficit/hyperactivity disorder (ADHD)? *European Psychiatry*, *52*, 38-44.

*Weyandt, L., DuPaul, G. J., Verdi, G., Rossi, J. S., Swentosky, A. J., Vilardo, B. S., ... & Carson, K. S. (2013). The performance of college students with and without ADHD: Neuropsychological, academic, and psychosocial functioning. *Journal of Psychopathology and Behavioral Assessment*, *35*(4), 421-435.

*White, H. A., & Marks, W. (2004). Updating memory in list-method directed forgetting: Individual differences related to adult attention-deficit/hyperactivity disorder. *Personality and Individual Differences*, *37*(7), 1453-1462.
